# Supplementary material
Source: PubMed Central journal article supplement (PMC10355958)
Supplement: 12672_2014_215_MOESM1_ESM.pdf [file 12672_2014_215_MOESM1_ESM.pdf]

## Online Resource 1

### Mouse Genotyping Primers

| <u>primer</u> | <u>sequence 5'-3'</u>   |
|---------------|-------------------------|
| Qtract.g F    | ACCCAGAGGCCGCGAGCGC     |
| Qtract.g R    | GCACTCCAGGGCCGACTGCG    |
| ETV1.g F      | GCCAACTGGGATGCAAGACACT  |
| ETV1.g R      | AGAAAGCTGGCGGCGAAATC    |
| Pten.g 1      | ACTCAAGGCAGGGATGAGC     |
| Pten.g 2      | AATCTAGGGCCTCTTGTGCC    |
| Pten.g 3      | GCTTGATATCGAATTCCTGCAGC |

### Mouse qRT-PCR Primers

| <u>primer</u> | <u>sequence 5'-3'</u>   |
|---------------|-------------------------|
| Pbsn F        | AGGGACTAAGTGCCAACTGTA   |
| Pbsn R        | ACTCCAGCCACTCGTGTGA     |
| Tmprss2 F     | CAGTCTGAGCACATCTGTCCCT  |
| Tmprss2 R     | CTCGGAGCATACTGAGGCA     |
| Nkx3-1 F      | GACTGTGAACATAATCCAGGGG  |
| Nkx3-1 R      | TGATGGCTGAACTTCCTCTCC   |
| Clu F         | TCCCGGAAGTGTGTAACGAGA   |
| Clu R         | CGCCGTTTCATCCAGAAGTAGA  |
| Pten F        | TGCACAGTATCCTTTTGAAGACC |
| Pten R        | GAATTGCTGCAACATGATTGTCA |
| hAR F         | AAGCACTGCTGCTCTTCAGC    |
| hAR R         | GAAGTATGCAGCTCTCTTGC    |
| Actb F        | AGTGTGACGTTGACATCCGTA   |
| Actb R        | GCCAGAGCAGTAATCTCCTTCT  |

### Human qRT-PCR Primers

| <u>primer</u> | <u>sequence 5'-3'</u> |
|---------------|-----------------------|
| CXCL16 F      | GCAGCGTCACTGGAAGTTG   |
| CXCL16 R      | ATCCCCGAGTAAGCATGTCC  |
| NUPR1 F       | ATGGCCACCTTCCCAC      |
| NUPR1 R       | TCAGCGCCGTGCCCTCG     |
| ACTB F        | CAAAGACCTGTACGCCAACA  |
| ACTB R        | TCAGGAGGAGCAATGATC    |
| GAPDH F       | TGCACCACCAACTGCTTAGC  |
| GAPDH R       | GGCATGGACTGTGGTCATGAG |
