# Supplementary material
Source: PubMed Central journal article supplement (PMC10355958)

# Online Resource 4

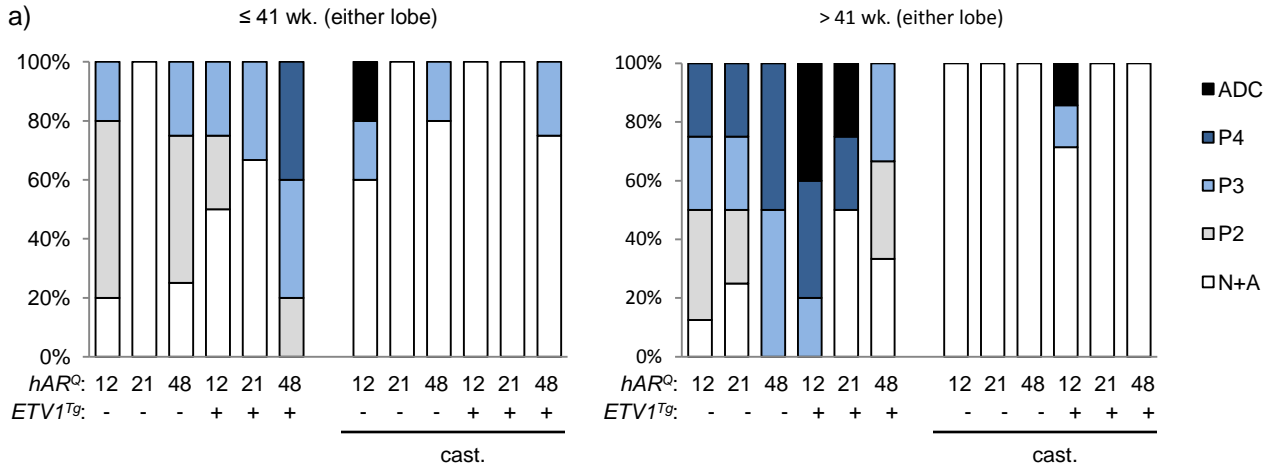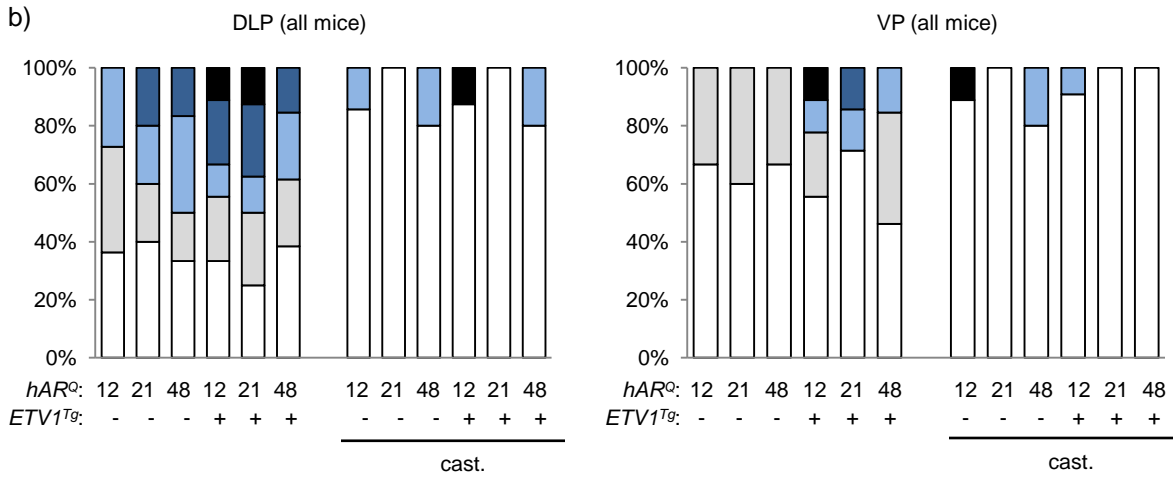

Supplement: 12672_2014_215_MOESM4_ESM.pdf [file 12672_2014_215_MOESM4_ESM.pdf]

# Online Resource 5

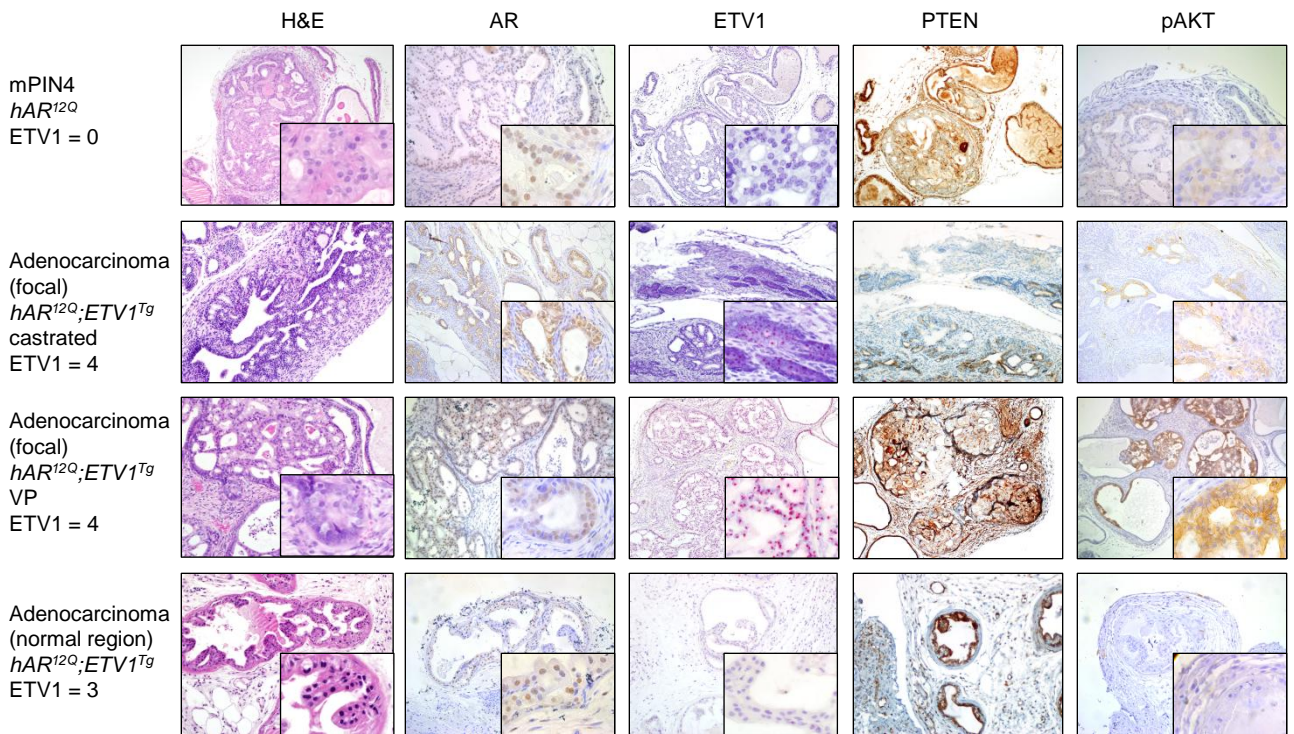

Supplement: 12672_2014_215_MOESM5_ESM.pdf [file 12672_2014_215_MOESM5_ESM.pdf]

# Online Resource 6

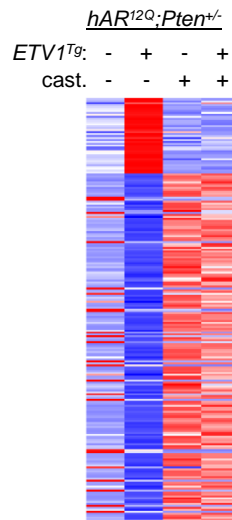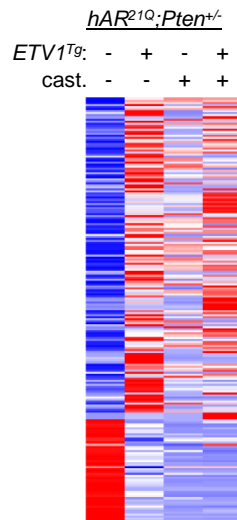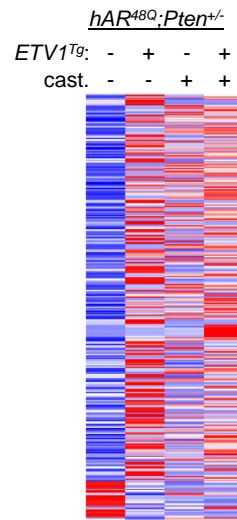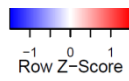

Supplement: 12672_2014_215_MOESM6_ESM.pdf [file 12672_2014_215_MOESM6_ESM.pdf]
